# Supplementary material
Source: PubMed Central journal article supplement (PMC3372268)
Supplement: supp_32.12.2239_MCB-MCB06597-11-s01.pdf [file supp_32.12.2239_MCB-MCB06597-11-s01.pdf]

Supplement Fig. S1

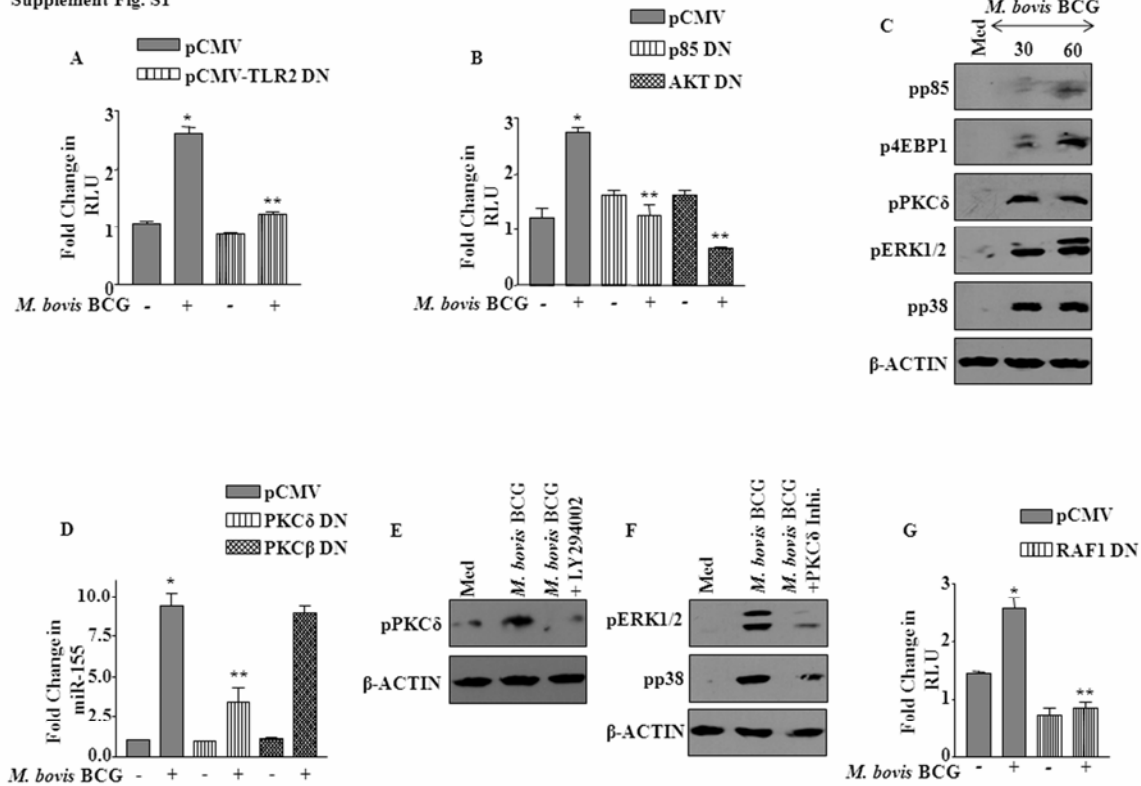

## Supplemental Figure S1. *M. bovis* BCG triggers activation of TLR2/PI3K/PKCδ/MAPK

**signaling axis.** (A) RAW 264.7 macrophages were transfected with TLR2 DN or vector control and *M. bovis* BCG induced up-regulation of miR-155 was monitored using real time quantitative RT-PCR. Data are mean  $\pm$  SE, n = 3. (B) Dominant negative mutants of p85 and AKT kinases were over-expressed in macrophages and change in miR-155 promoter luciferase activity was monitored after *M. bovis* BCG infection. Control macrophages were transfected with pCMV vector alone. (mean  $\pm$  SE, n = 3). (C) The kinetics of PI3K/PKCδ/MAPK signaling dynamics upon *M. bovis* BCG infection of macrophages is shown. Western blots are representative of 3 separate experiments. (D) Upon transfection of macrophages with dominant negative mutants of PKCδ and PKCβ kinases, cells were infected with *M. bovis* BCG and change in expression levels

12 of miR-155 was assayed using real time quantitative RT-PCR. (mean  $\pm$  SE, n = 3). (E)  
13 Pretreatment of macrophages with LY294002 (PI3K inhibitor) significantly reduced *M. bovis*  
14 BCG induced activation of PKC $\delta$ . (F) Abrogation of PKC $\delta$  activity by PKC $\delta$  inhibitor,  
15 suppressed *M. bovis* BCG triggered activation of ERK1/2 and p38 MAPKs. Blots represent 2  
16 independent experiments. (G) RAF1 dominant negative mutant was over-expressed in  
17 macrophages. Upon infection with *M. bovis* BCG, miR-155 promoter luciferase activity was  
18 assayed. Data represents a mean of 3 independent experiments. RLU, Relative luciferase units;  
19 Med, Medium; \*, P < 0.05 versus control, \*\*, P < 0.05 versus *M. bovis* BCG infected  
20 macrophages.

21

Supplement Fig. S2

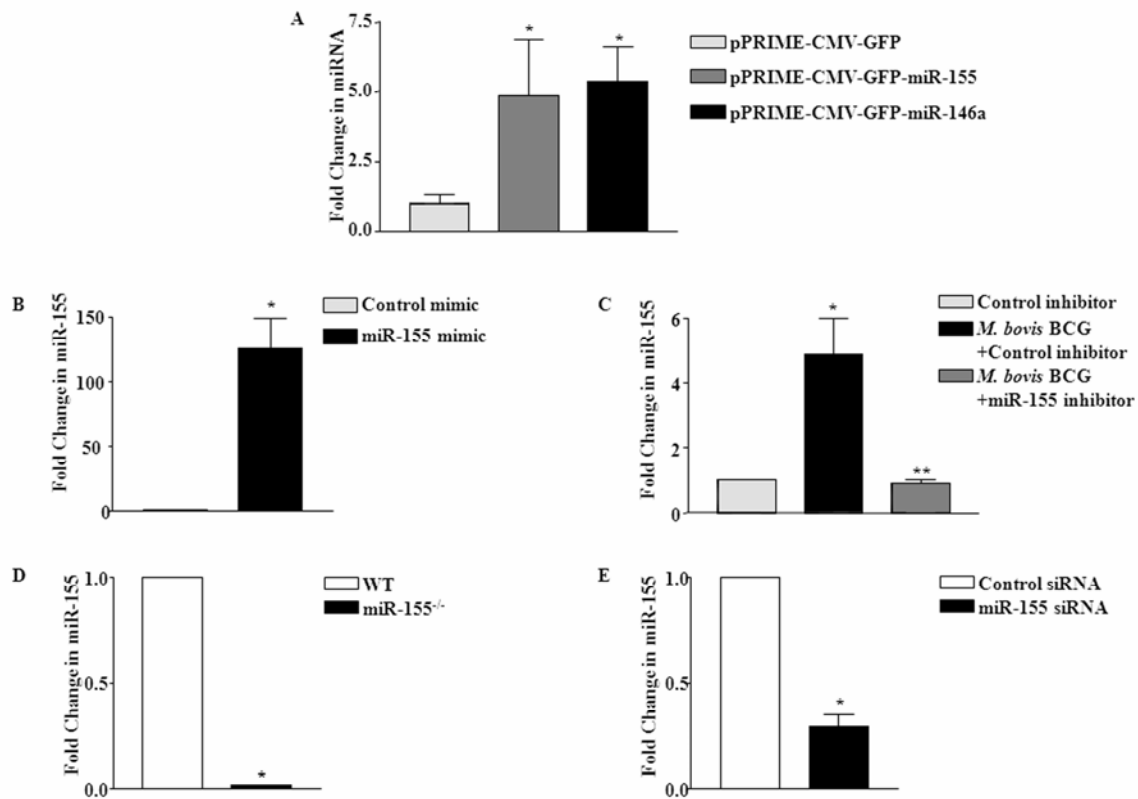

## Supplemental Figure S2. Validation of miR-155 over-expression/silencing. (A and B)

Macrophages were transfected with miR-155 over-expressing plasmid (pPRIM-CMV-GFP-miR-155) or miR-146a over-expressing plasmid (pPRIM-CMV-GFP-miR-146a) or control vector (A) or miR-155 mimic and corresponding control mimic (B). The over-expression levels of miR-155 and miR-146a were assayed by real time quantitative RT-PCR analysis (mean  $\pm$  SE, n = 3). (C) Macrophages were transfected with control inhibitor or anti-miR-155 (miR-155 inhibitor) prior to *M. bovis* BCG infection. Expression of miR-155 was assayed by real time quantitative RT-PCR. Data represent mean  $\pm$  SE of 3 different set of experiments. (D) Expression levels of miR-155 in WT and miR-155<sup>-/-</sup> BMDM was assayed by real time quantitative RT-PCR. (mean  $\pm$  SE, n = 5). (E) Silencing of miR-155 in miR-155 siRNA transfected macrophages was validated by

33 real time quantitative RT-PCR. The expression levels were compared with control siRNA  
34 transfected cells. (mean  $\pm$  SE, n = 3). Med, Medium; \*, P < 0.05 versus control; \*\*, P < 0.05  
35 versus *M. bovis* BCG stimulation.

Supplement Fig. S3

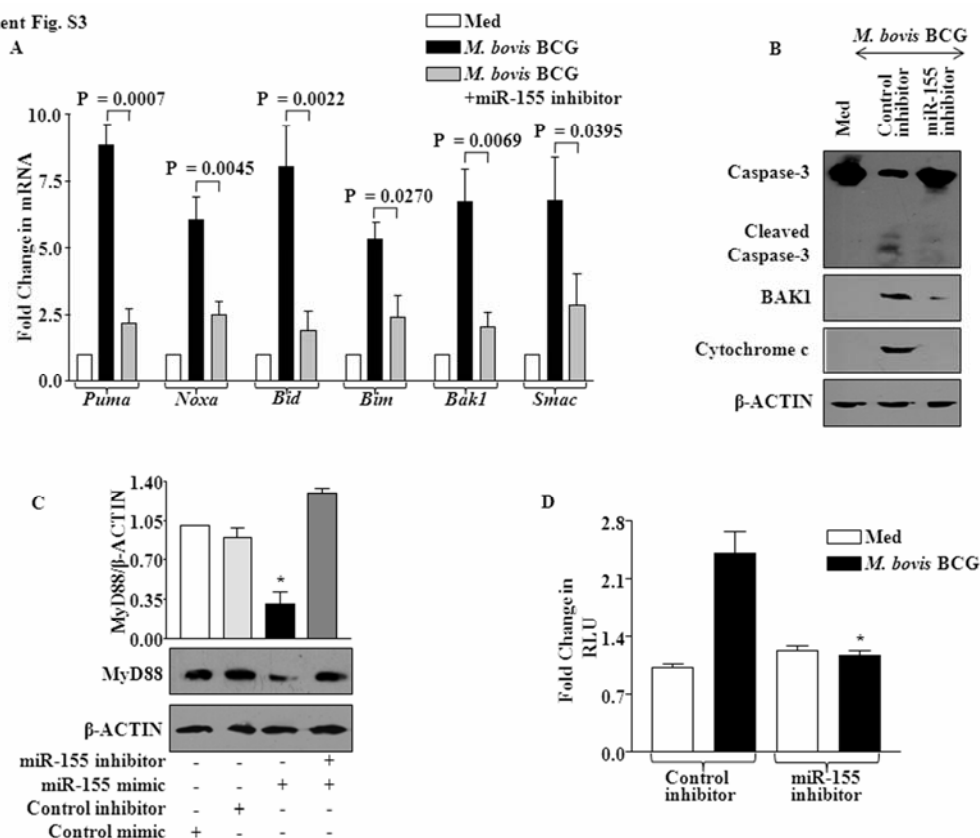

36

**Supplemental Figure S3. miR-155 is a inducer of apoptosis.** (A) A set of macrophages were transfected with control inhibitor oligonucleotides or with miR-155 inhibitor oligonucleotide. Upon infection of macrophages with *M. bovis* BCG, change in the expression levels of pro-apoptotic genes were monitored using real time quantitative RT-PCR analysis (mean  $\pm$  SE, n = 3). (B) Macrophages were treated as explained in panel A and activation of apoptosis was assayed using western blot analysis. Blots are representative of 3 independent experiments. (C) The inhibitory role of miR-155 inhibitor oligonucleotides was validated by co-transfection of miR-155 mimics and miR-155 inhibitor oligonucleotides. Total cell protein was harvested and expression levels of MyD88, a well characterized target of miR-155 were assayed using western blot analysis. Representative blots along with quantification of 3 independent experiments are

47 shown. \*,  $P < 0.05$  versus control. (D) Macrophages were co-transfected with miR-155 promoter  
48 luciferase constructs and miR-155 inhibitor oligonucleotides or control inhibitor. Upon infection  
49 with *M. bovis* BCG, miR-155 promoter luciferase activity was assayed. (mean  $\pm$  SE,  $n = 4$ ). \*,  $P$   
50  $< 0.05$  versus *M. bovis* BCG infected macrophages.

Supplement Fig. S4

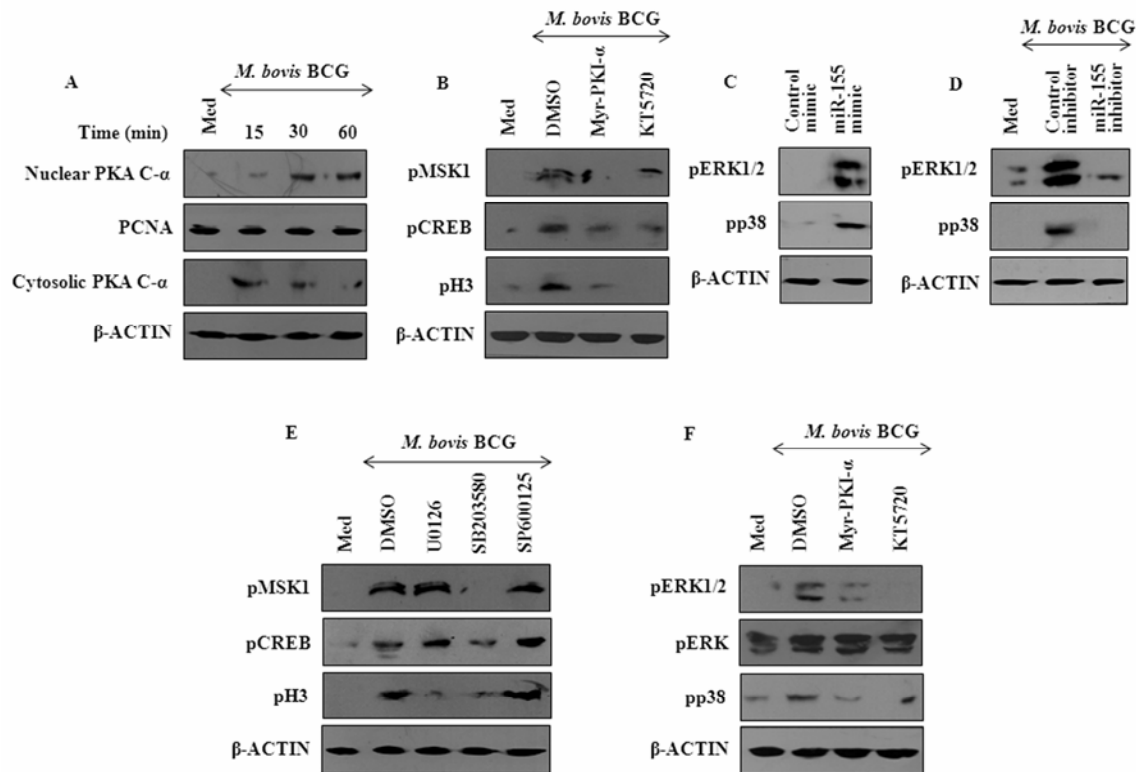

**Supplemental Figure S4. miR-155 plays a vital role in regulating *M. bovis* BCG activated**

**PKA pathway. (A) *M. bovis* BCG infection activates the PKA signaling as monitored by nuclear**

translocation of PKA catalytic subunit (PKA C-α) into the nucleus. (B) Abrogation of PKA

activity by pharmacological reagents regulates MSK1, CREB and H3 phosphorylation. (C and

D) Over-expression of miR-155 or silencing of miR-155 by transfecting macrophages with miR-

155 mimic (C) and miR-155 inhibitor (D) respectively modulates ERK1/2 and p38 activation.

Blots show phosphorylation of ERK1/2 and p38 protein levels. (E) Pretreatment of macrophages

with a series of MAPK specific inhibitor prior to *M. bovis* BCG infection abrogates MSK1,

CREB and H3 activation. (F) PKA activity modulates ERK1/2 and p38 activation as treatment of

PKA inhibitors abrogates ERK1/2 and p38 phosphorylation. Western blots are representative of

- 62 3 independent experiments. DMSO serves a vehicle control and  $\beta$ -ACTIN as loading control.
- 63 Med, Medium.
